# Supplementary material for: Differential Metabolic and Transcriptional Responses of Gilthead Seabream (Sparus aurata) Administered with Cortisol or Cortisol-BSA
Source: MDPI journal article supplement (doi:10.3390/ani11113310), 2021-11-19
Supplement: s1 [file s1]

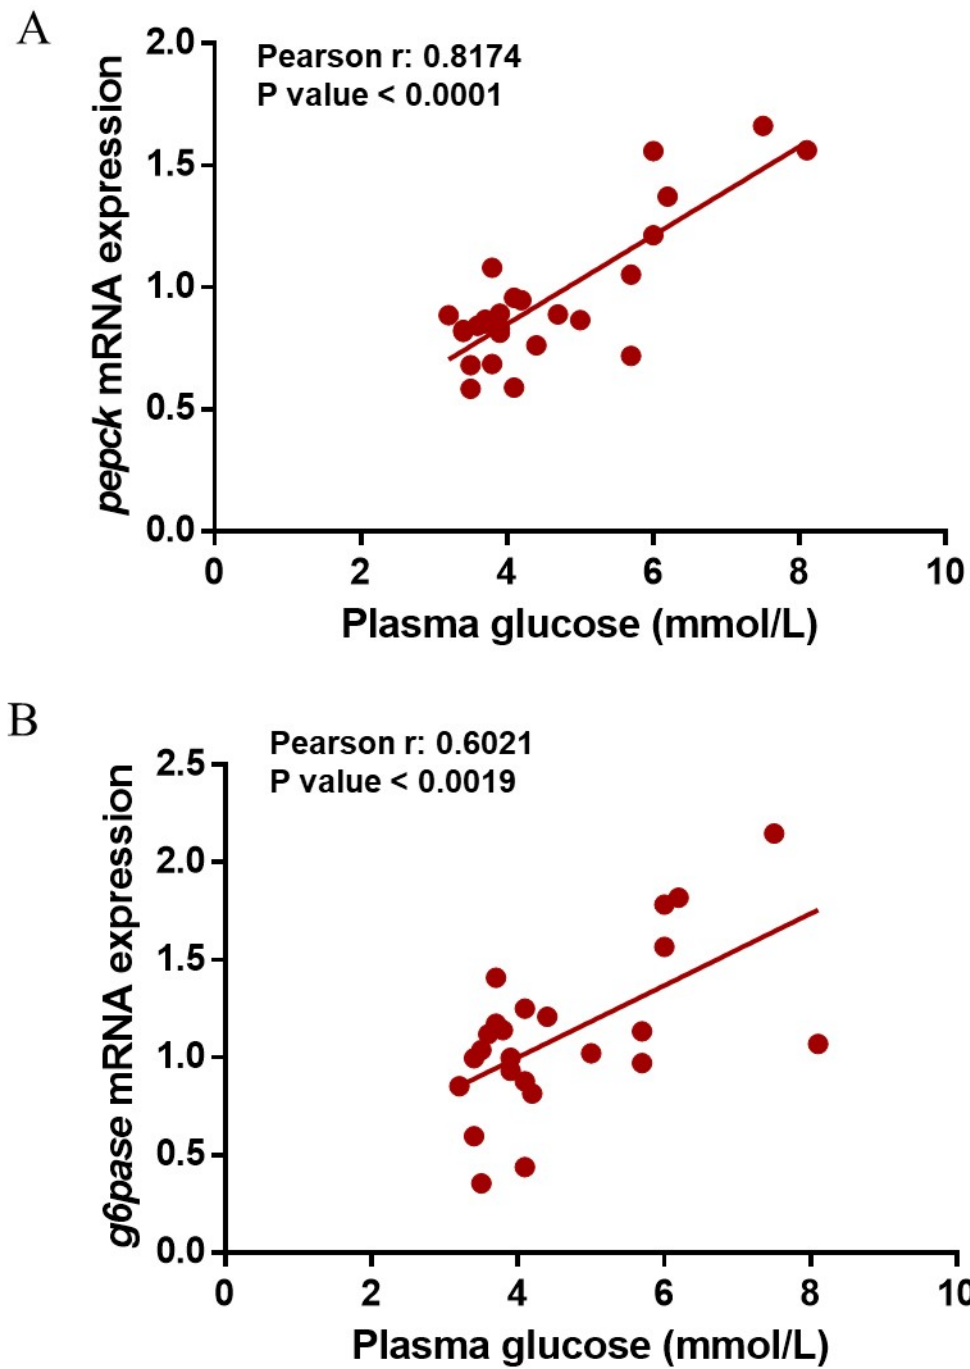

**Figure S1.** Correlation between both gluconeogenesis-related genes expression, *pepck* (A) and *g6pc* (B), and plasma glucose levels for each fish.
