# Supplementary material for: Differential Metabolic and Transcriptional Responses of Gilthead Seabream (Sparus aurata) Administered with Cortisol or Cortisol-BSA
Source: Animals (Basel). 2021 Nov 19;11(11):3310. doi: 10.3390/ani11113310 (PMC8614361; doi:10.3390/ani11113310)
Supplement: Supplementary file 1 [file animals-11-03310-s001.zip › Table S1.xlsx]

## Sheet: Hoja1
Table S1: List of primers used for RT-qPCR.
Gene name	Gene ID	Sequence 5’ – 3’	% Eff	R2	% Eff	R2	TM	Amplicon
			(Liver)	(Liver)	(Muscle)	(Muscle)	(°C)	(bp)
beta actin	actb	F: TCTTCCAGCCATCCTTCCTCG	95.7	0.988	97.9	0.997	60	108
		R: TGTTGGCATACAGGTCCTTACGG
elongation factor 1α	ef1a	F: AGAGGCTGTCCCTGGTGA	92.3	0.991	100.3	0.982	60	100
		R: TGATGACCTGAGCGTTGAAG
*glucocorticoid receptor 1	gr1	F: GGTTCAGCAGCAGTTCCTC	99.7	0.988	98.2	0.993	60	197
		R: GGTCTTGGTCGCCTTTATCC
glucocorticoid receptor 2	gr2	F: ATCGTCAAGAGGGAGGAGAAC	99.5	0.996	95.1	0.983	60	187
		R: TTGGTATCTGGTTGGTGATGA
mineralocorticoid receptor	mr	F: CGCCTGGCTGGAAAGCAGATG	105.7	0.998	98.5	0.935	60	189
		R: GAGGTCAGGGGCAAAGTAGAGCAT
glucose 6 phosphatase	g6pase	F: GACCAAGAACACAAGCACCA	98.9	0.967	_	_	60	166
		R: AACCAGAGTCGTCGGGATTA
phosphoenolpyruvate carboxykinase	pepck	F: TCACACTCACGGACTGG	96.4	0.987	_	_	60	111
		R: CAATGATGGGACACTGACC
fructose-bisphosphate aldolase	aldol	F: AATGTCCTTGCCAGATACGC	90.3	0.994	103.0	0.968	60	137
		R: TATACAGCCGCCAGAACCTT
phosphoglycerate mutase 1	pgam1	F: AGAGGGGAAAAGGGTGCT	102.5	0.953	103.9	0.977	60	153
		R: CAGGCTTCAGGTTCTTGTC
enolase 3	eno3	F: TGACAGTGACCAATCCCAAG	99.9	0.988	98.6	0.992	60	99
		R:CTGACCATCACACCCCAA
atrogin 1	fbxo32	F: AGAGCAGCAGGTTCTCCTTG	_	_	95.9	0.987	60	138
		R: CGGGTCAGAGTTGGGTTAAA
muscle RING-finger protein-1	murf1	F: TGCTGGTGGAGAACATCATC	_	_	99.3	0.991	60	96
		R: CCTTGGTGTCTTTGTCCTTCA
Eff % means efficiency percentage, and TM means melting temperature
